# Supplementary material for: Self and Nonself Short Constituent Sequences of Amino Acids in The SARS-CoV-2 Proteome for Vaccine Development
Source: Research Square preprint supplement (doi:10.21203/rs.3.rs-637436/v1), 2021-07-19
Supplement: Supplementary file 1 [file f3dd83365170de36323af222.pdf]

## Supplementary Information

### ARTICLE

## Self and nonself short constituent sequences of amino acids in the SARS-CoV-2 proteome for vaccine development

Joji M. Otaki <sup>1\*</sup>, Wataru Nakasone <sup>2</sup>, Morikazu Nakamura <sup>2</sup>

<sup>1</sup> The BCPH Unit of Molecular Physiology, Department of Chemistry, Biology and Marine Science, University of the Ryukyus, Okinawa 903-0213, Japan

<sup>2</sup> Computer Science and Intelligent Systems Unit, Department of Information and Engineering, Faculty of Engineering, University of the Ryukyus, Okinawa 903-0213, Japan

\*email: [otaki@sci.u-ryukyu.ac.jp](mailto:otaki@sci.u-ryukyu.ac.jp)

Supplementary Results

Supplementary Discussion

Supplementary Methods

Supplementary References

Supplementary Figure S1

Supplementary Tables S1, S2, S3, and S4

## Supplementary Results

### Self-nonsel status changes in the SARS-CoV-2 proteome

Mutations can be categorized into two distinct groups: one causes a self-to-nonsel (0-to-1) status change, and the other causes a nonself-to-self (1-to-0) status change. The former may increase the chance of being recognized and eliminated by the immune system, and the latter may decrease this chance. In the 68 SARS-CoV-2 variant proteome sequences examined, we found 19 SCSs that changed self-nonsel status due to their own or surrounding mutations (Supplementary Table S3; Additional Data 3 at GitHub). Among them, 11 were self-to-nonsel (0-to-1) changes, and 8 were nonself-to-self (1-to-0) changes. Since there were 8,809 self SCSs and 852 nonself SCSs in the SARS-CoV-2 proteome, 0.125% of self SCSs changed to nonself SCSs (status change rate), whereas 0.939% of nonself SCSs changed to self SCSs. The percentage ratio of nonself-to-self changes to self-to-nonsel changes was 7.51, and these two frequencies were significantly different ( $\chi^2$  test:  $df = 1$ ,  $t = 26.0$ ,  $p < 0.0001$ ;  $df = 1$ ,  $t = 22.0$ ,  $p < 0.0001$  after Yates's adjustment). This means that nonself-to-self changes and their associated mutations (escaping mutations or mimicry mutations) were more frequent than self-to-nonsel changes and their associated mutations (exposing mutations).

Because self SCSs and nonself SCSs are not equally common in the 3.2 million SCS repertoire, probabilistically, a mutated residue may produce nonself SCSs less frequently than self SCSs. Conversion factors for this weight consideration in the human proteome were defined as  $\times(\text{self/nonself}) = \times(2,401,598/798,402) = \times 3.0$  for self-to-nonsel changes and  $\times 1.0$  for nonself-to-self changes. Using these conversion factors based on the human proteome, the number of self-to-nonsel changes was calculated as 33, and the number of nonself-to-self changes was calculated as 8. The self-to-nonsel status change rate was 0.375%, and the nonself-to-self status change rate was 0.939%. The percentage ratio of nonself-to-self changes to self-to-nonsel changes was thus 2.50. When the converted mutation frequencies between the two were subjected to the  $\chi^2$  test, a significant difference was still obtained at the level of  $p < 0.05$  ( $df = 1$ ,  $t = 5.6$ ,  $p = 0.016$ ;  $df = 1$ ,  $t = 4.5$ ,  $p = 0.033$  after Yates's adjustment).

From an immunological point of view, nonself-to-self changes would confer a survival advantage to the coronavirus, and this result is in accordance with this interpretation, if not just a coincidence. Among the 19 SCSs that changed self-nonsel status as discussed above, only a single SCS outside the RBD was found in the spike protein: a self SCS (796-DFGGF-800) that changed to a nonself SCS (796-DCGGF-800).

### Self-nonself status changes in the spike protein

A similar analysis was performed to focus on the spike protein using a set of functional mutations (48 point mutations, three of which were at redundant positions)<sup>40,41</sup>, a recent England variant (B.1.1.7) (6 additional point mutations)<sup>42</sup> and a South African variant (501Y.V2) (7 additional point mutations)<sup>43</sup>. Due to these point mutations, we discovered 26 self-to-nonsself status changes out of 1172 self SCSs (status change rate: 2.22%) and 10 nonsself-to-self status changes out of 97 nonsself SCSs (status change rate: 10.31%) (Supplementary Table S4; Additional Data 4 at GitHub). The percentage ratio of nonsself-to-self changes to self-to-nonsself changes was 4.65. When the status change frequencies were subjected to the  $\chi^2$  test, a significant difference was obtained ( $df = 1$ ,  $t = 18.9$ ,  $p < 0.0001$ ;  $df = 1$ ,  $t = 16.3$ ,  $p < 0.0001$  after Yates's adjustment).

Using conversion factors for weight adjustment based on the human proteome ( $\times 3.0$  for self-to-nonsself changes and  $\times 1.0$  for nonsself-to-self changes), the number of self-to-nonsself changes was now calculated as 78 (status change rate: 6.66%), and the number of nonsself-to-self changes was calculated as 10 (status change rate: 10.31%). The percentage ratio of nonsself-to-self changes to self-to-nonsself changes was 1.55. When the converted number of changes was subjected to the  $\chi^2$  test, no significant difference was obtained ( $df = 1$ ,  $t = 1.57$ ,  $p = 0.21$ ;  $df = 1$ ,  $t = 1.10$ ,  $p = 0.29$  after Yates's adjustment). This result suggests that the ongoing spike protein evolution in humans may not be driven by mimicry to escape immunological recognition and elimination.

Among the mutations that caused the nonsself-to-self status changes detected above, 4 mutation sites were directly located within the nonsself SCS clusters in the RBD discussed above (Fig. 2b; Supplementary Table 4). Three of them (I434K, A435S, and N439K) were located in the VIAWNSNN cluster of the 17-aa supercluster. An additional mutation site that does not change the self-nonsself status was located in the same cluster, suggesting that this is an unstable nonsself cluster. In contrast, only one status-changing site (F490L) was located in the 19-aa supercluster. This supercluster contained 3 additional mutation sites, but they did not change the self-nonsself status and were at the self-nonsself boundaries.

## Supplementary Discussion

Consistent with the discussion in the main text, throughout the proteome of SARS-CoV-2, nonself-to-self status changes were significantly greater than self-to-nonself status changes even after weighting, supporting the sequence mimicry hypothesis of host-parasite interactions; however, the sample size was small, and the conclusion here may thus be considered tentative. Similarly, the self-nonself status changes in SARS-CoV-2 spike protein also showed significant differences but only without a weight consideration. Spike protein evolution may not be driven much by sequence mimicry at present. Nonetheless, it is also true that nonself-to-self changes indeed occur in the spike protein at a probabilistically reasonable rate.

These results describe the real-time evolution of the virus, which may provide a hint at viral dynamics. The accumulation of nonself-to-self mutations (hereafter called mimicry mutations) may be an unavoidable evolutionary route for any pathogen after its host change as a consequence of immunological escape. These mutations would occur independently of those that increase the virulence of the virus. However, for the sake of discussion, we assume here that mutations occur exclusively for sequence mimicry and that viral virulence is determined by the mimicry level. First, the number of mimicry mutations is considered a function of time after a host change. Mimicry mutations are advantageous for any pathogen and will accumulate rapidly until a saturation point at which further accumulation of such mutations harms the molecular functions of viral proteins (route *A* to *B* in Supplementary Fig. S1a). Alternatively, harmful mutations may gradually accumulate to increase the mimicry level (routes *A* to *C* in Supplementary Fig. S1a). These harmful mutations will be eliminated by natural selection when they reduce the survival of the virus.

Second, possible contributions of mimicry mutations to survival and virulence are considered. At a relatively low level, an increase in mimicry mutations simply means that the virus can escape the host immune system better, directly contributing to viral virulence and simultaneously contributing to viral survival (route *A* for both survival and virulence in Supplementary Fig. S1b). Here, survival and virulence may show similar dynamics, and mimicry mutations may reach the maximum level of virulence without harming molecular functions. The level of mimicry mutations may become stable at the maximum point. A further increase in mimicry mutations, if it occurs, may negatively impact the molecular functions of viral proteins, reducing virulence, and this may result in a simultaneous decrease in the survival of the virus (routes *A* to *B* for both survival and virulence in Supplementary Fig. S1b). This excessive mimicry is not favorable for the

viral existence. Alternatively, such an increase in mimicry mutations may enhance the survival of the virus at the expense of virulence or molecular functionality (routes *A* to *C* for survival and routes *A* to *B* for virulence in Supplementary Fig. S1b). In this way, survival and virulence may show two different dynamics in response to mimicry mutations. This scenario may be more likely to sustain viral existence due to a higher level of survival, and such mutations may open the possibility of a benign life cycle in response to a decrease in immunological selection pressure. Over time, the virus may find an equilibrium between functional compromise (low virulence) and immunological escape (high invisibility) for coexistence. The present study suggests that the SARS-CoV-2 proteome (although not spike protein) may currently be under such an evolutionary process, and we predict that the current pandemic of SARS-CoV-2 may cease over time due to the accumulation of mimicry mutations. Unfortunately, we are unable to predict when this might occur. Large-scale bioinformatics studies may make such predictions possible.

Additionally, many further studies remain unexplored. For example, the nonself SCSs in the SARS-CoV-2 proteome (other than spike proteins) identified in this study have not been examined thoroughly in terms of the possibilities of their functioning as epitopes. An analysis of human proteome variants may reveal differences in infectivity among human individuals and could predict prognosis. An analysis of other pathogens in relation to the human proteome may further test the sequence mimicry hypothesis. This hypothesis may be widely applicable not only to a host-pathogen relationship but also to a host-parasite relationship widely seen in biological mutualism. The nonself definition in the present study (i.e., zero-count SCSs) may vary under different genetic backgrounds and environmental conditions, which may trigger or prevent autoimmune diseases. Reflecting the worldwide pandemic, numerous mutations in SARS-CoV-2 have been detected<sup>54,55</sup>, and these mutations should be analyzed more comprehensively *in silico* in the future. Such studies will be able to contribute to improved vaccines. Other lines of preventive and treatment measures, such as nutritional balance that could induce nitric oxide (NO) production<sup>55</sup> and traditional complementary medicine<sup>57,58</sup>, should also be encouraged.

The present study can be considered an application of the SCS concept to physiological problems. The SCS concept is simple, and its applications are diverse<sup>10</sup>. This field of study has expanded *in silico*<sup>32,33,59-67</sup>, but the SCS concept has not yet been sufficiently explored to understand physiological systems. To our knowledge, the first

physiological application in this field is the use of a group of peptides as immunological adjuvants<sup>68,69</sup>. The search for human-specific proteins is also an example of SCS-based physiological studies<sup>70</sup>. We anticipate that the present study will expand important frontiers of physiological studies from the viewpoint of the SCS concept.

## Supplementary Methods

**Characterization of the human and SARS-CoV-2 proteomes.** Source Codes for Human SCS Analysis and for SARS-CoV-2 SCS Analysis were used to calculate parameters of SCS distributions in the human and SARS-CoV-2 proteomes, which were placed at GitHub, <https://adslab-uryukyu.github.io/scs-sars-cov-2/>. Calculations were performed not only for SCS frequencies shown in Fig. 1a-c but also for other tasks such as exact SCSs for a particular rank range and availability scores<sup>24,25</sup>. SCS length can be adjusted as 3-aa, 4-aa, or 5-aa residues.

**Variant proteomes.** We first downloaded 93 variant proteomes in addition to the reference proteome (ASM985889v3). Among them, the 67 variant proteomes that were analyzed for proteome-wide mutations were as follows: ASM993789v1, ASM993791v1, ASM993792v1, ASM993793v1, ASM993794v1, ASM1153697v1, ASM1153700v1, ASM1153701v1, ASM1153706v1, ASM1153707v1, ASM1153708v1, ASM1153713v1, ASM1153714v1, ASM1153722v1, ASM1153723v1, ASM1153726v1, ASM1153735v1, ASM1153736v1, ASM1153742v1, ASM1153745v1, ASM1153747v1, ASM1153750v1, ASM1154508v2, ASM1154509v2, ASM1154512v2, ASM1154513v1, ASM1154528v2, ASM1154529v1, ASM1154532v2, ASM1154533v2, ASM1154534v1, ASM1154535v1, ASM1154542v1, ASM1154545v1, ASM1154548v1, ASM1154550v1, ASM1154553v1, ASM1154555v1, ASM1174199v1, ASM1174200v2, ASM1174201v1, ASM1174202v1, ASM1174203v1, ASM1153751v1, ASM1153752v2, ASM1153755v1, ASM1153756v1, ASM1153761v1, ASM1153762v1, ASM1153769v1, ASM1153770v1, ASM1153771v1, ASM1153781v1, ASM1153782v2, ASM1153783v2, ASM1153786v2, ASM1153789v2, ASM1153794v2, ASM1153797v2, ASM1153798v2, ASM1153802v2, ASM1153805v2, ASM1153810v2, ASM1154497v2, ASM1154502v2, ASM1154506v2, ASM1154507v2.

Other 26 proteomes that were not analyzed further due to insertions and deletions were as follows: ASM993788v1, ASM993790v1, ASM993805v1, ASM993806v1, ASM994842v1, ASM994846v1, ASM994849v1, ASM994852v1, ASM994855v1, ASM1153693v1, ASM1153715v1, ASM1153729v1, ASM1153732v1, ASM1153739v1, ASM1153746v1, ASM1153778v1, ASM1153801v2, ASM1154503v2, ASM1154516v1, ASM1154523v1, ASM1154524v1, ASM1154527v1, ASM1154549v1, ASM1154554v1, ASM1308859v1, ViralProj15500.

**Point mutations in the spike protein.** The point mutations that were analyzed for the spike mutations in this study were as follows<sup>39-42</sup>: L5F, L18F, D80A, N122Q, N165Q, D215G, N234Q, Q239K, R246I, N331Q, V341I, N343Q, D364Y, V367F, D405V, Q409E, Q414E/P, K417N, I434K, A435S, S438F, N439K, L452R, K458R, D467V, I468F/T, I472V, A475V, V483A, E484K, F490L, P491R, N501Y, V503F, Y508H, R509K, V510L, P521S, A522V, A570D, D614G, Q675H, P681H, A701V, N709Q, T716I, N717Q, T719A, N801Q, A831V, D839Y, D936Y, S939F, S943T, S982A, N1074Q, D1118H, P1263L.

**Identification of nonself SCSs in a 3D model of the spike protein.** Nonself SCSs identified as potential candidates for vaccine targets (**Fig. 2b**) were further examined in their locations in a 3D model of the spike protein (**Fig. 3**). To do so, a 3D structural data of the spike protein (PDB ID: 6VYB)<sup>36</sup> in the Protein Data Bank (PDB) managed by the Research Collaboratory for Structural Bioinformatics (RCSB) were accessed<sup>71</sup>. This structure has been determined by cryo-EM at 3.20-Å resolution<sup>36</sup>. The structure was viewed and the nonself SCSs were highlighted by Mol\*, a built-in viewer of the RCSB-PDB<sup>72</sup>.



## Supplementary References

54. Toyoshima, Y. et al. SARS-CoV-2 genomic variations associated with mortality rate of COVID-19. *J. Hum. Genet.* **65**, 1075-1082 (2020).
55. Laha, S. et al. Characterizations of SARS-CoV-2 mutational profile, spike protein stability and viral transmission. *Infect. Genet. Evol.* **85**, 104445 (2020).
56. Yamasaki, H. Blood nitrate and nitrite modulating nitric oxide bioavailability: Potential therapeutic functions in COVID-19. *Nitric Oxide* **103**, 29-30 (2020).
57. Yang, Y. et al. Traditional Chinese Medicine in the treatment of patients infected with 2019-new coronavirus (SARS-CoV-2): A review and perspective. *Int. J. Biol. Sci.* **16**, 1708-1717 (2020).
58. Liu, M. et al. Efficacy and safety of Integrated Traditional Chinese and Western Medicine for corona virus disease 2019 (COVID-19): a systematic review and meta-analysis. *Pharmacol. Res.* **158**, 104896 (2020).
59. Yu, L. et al. Grammar of protein domain architectures. *Proc. Natl. Acad. Sci. USA* **116**, 3636-3645 (2019).
60. Figureau, A., Soto, M. A. & Tohá, J. A pentapeptide-based method for protein secondary structure prediction. *Protein Engineering* **16**, 103-107 (2003).
61. Pe'er, I. et al. Proteomic signatures: Amino acid and oligopeptide compositions differentiates among phyla. *Proteins* **54**, 20-40 (2004).
62. Vries, J.K., Liu, X. & Bahar, I. The relationship between n-gram patterns and protein secondary structure. *Proteins* **68**, 830-838 (2007).
63. Daeyaert, F., Moereels, H. & Lewi, P. J. Classification and identification of proteins by means of common and specific amino acid n-tuples in unaligned sequences. *Comput. Methods Programs Biomed.* **56**, 221-233 (1998).
64. Imai, K. & Nakai, K. Tools for the recognition of sorting signals and the prediction of subcellular localization of proteins from their amino acid sequences. *Front. Genet.* **11**, 607812 (2020).
65. Chou, K. C. Prediction of protein cellular attributes using pseudo amino acid composition. *Proteins* **43**, 246-255 (2001).
66. Tsutsumi, M. & Otaki, J. M. Parallel and antiparallel  $\beta$ -strands differ in amino acid composition and availability of short constituent sequences. *J. Chem. Inf. Model.* **51**: 1457-1464 (2011).
67. Otaki, J. M., Tsutsumi, M., Gotoh, T. & Yamamoto, H. Secondary structure characterization based on amino acid composition and availability in proteins. *J. Chem. Inf. Model.* **50**: 690-700 (2010).
68. Patel, A. et al. Pentamers not found in the universal proteome can enhance antigen specific immune responses and adjuvant vaccines. *PLoS One* **7**, e3802 (2012).
69. Le, H.-T. et al. Enhancing the immune response of a nicotine vaccine with synthetic small “non-natural” peptides. *Molecules* **25**, 1290 (2020).
70. Endo, S. et al. (2020) Search for human-specific proteins based on availability scores of short constituent sequences: Identification of a WRWSH protein in human testis. In: Behzadi, P. & Bernabò, N. (Eds) *Computational Biology and Chemistry*. pp. 11-33. IntechOpen, London.
71. Berman, H. M., Westbrook, J., Feng, Z., Gilliland, G., Bhat, T. N., Weissig, H.; Shindyalov, I. N. & Bourne, P. E. The Protein Data Bank. *Nucleic Acids Res.* **28**, 235-242 (2000).
72. Sehnal, D., Rose, A. S., Koča, J., Burley, S. K. & Velankar, S. Mol\*: toward a common library and tools for web molecular graphics. *MolVA '18: Proceedings of the Workshop on Molecular Graphics and Visual Analysis of Molecular Data*. 29-33 (2018).

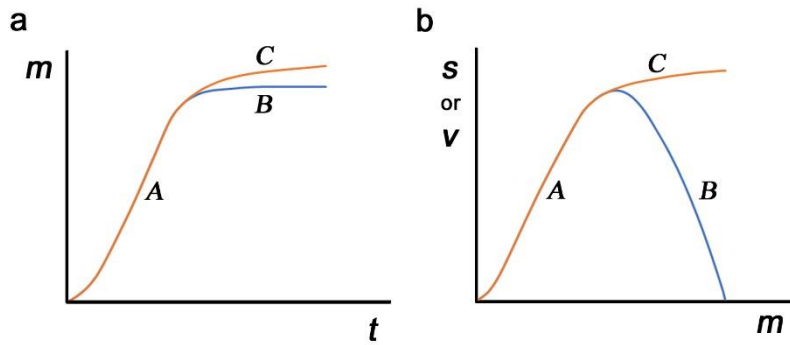

**Supplementary Fig. S1. Possible dynamics of mimicry ( $m$ ), survival ( $s$ ), and virulence ( $v$ ) of a parasite.** (a) Mimicry mutations ( $m$ ) as a function of time ( $t$ ). Routes  $A$ - $B$  and routes  $A$ - $C$  may be possible. (b) Survival ( $s$ ) and virulence ( $v$ ) as a function of mimicry ( $m$ ). At the relatively low level of  $m$ , both  $s$  and  $v$  may follow  $A$ , but after the critical point,  $v$  may follow  $B$ , and  $s$  may separately follow  $C$ .

**Supplementary Table S1. Number of self and nonself SCSs in the SARS-CoV-2 proteins.**

|                         | <b>Number of<br/>Self SCS</b> | <b>Number of<br/>Nonself SCS</b> | <b>Number of<br/>Total SCS</b> | <b>Nonself SCS<br/>[%]</b> |
|-------------------------|-------------------------------|----------------------------------|--------------------------------|----------------------------|
| <b>ORF1ab</b>           | 6450                          | 642                              | 7092                           | 9.05                       |
| <b>Spike (S)</b>        | 1172                          | 97                               | 1269                           | 7.64                       |
| <b>ORF3a</b>            | 240                           | 31                               | 271                            | 11.44                      |
| <b>Envelope (E)</b>     | 64                            | 7                                | 71                             | 9.86                       |
| <b>Membrane (M)</b>     | 203                           | 15                               | 218                            | 6.88                       |
| <b>ORF6</b>             | 51                            | 6                                | 57                             | 10.53                      |
| <b>ORF7a</b>            | 111                           | 6                                | 117                            | 5.13                       |
| <b>ORF8</b>             | 104                           | 13                               | 117                            | 11.11                      |
| <b>Nucleocapsid (N)</b> | 386                           | 29                               | 415                            | 6.99                       |
| <b>ORF10</b>            | 28                            | 6                                | 34                             | 17.65                      |
| <b>Total</b>            | 8809                          | 852                              | 9661                           | 8.82                       |

**Supplementary Table S2. Distribution of nonself SCS clusters in the SARS-CoV-2 proteins.**

| aa   | ORF1ab | S  | ORF3a | E | M | OR6 | OR7a | ORF8 | N | ORF10 | Total |
|------|--------|----|-------|---|---|-----|------|------|---|-------|-------|
| 5aa  | 152    | 24 | 6     | 0 | 4 | 2   | 1    | 5    | 4 | 0     | 198   |
| 6aa  | 31     | 6  | 1     | 0 | 0 | 1   | 1    | 1    | 1 | 0     | 42    |
| 7aa  | 24     | 1  | 1     | 0 | 0 | 0   | 0    | 0    | 4 | 0     | 30    |
| 8aa  | 21     | 5  | 1     | 0 | 1 | 1   | 1    | 0    | 1 | 1     | 32    |
| 9aa  | 27     | 3  | 1     | 1 | 0 | 0   | 0    | 0    | 1 | 1     | 34    |
| 10aa | 13     | 1  | 0     | 1 | 1 | 0   | 0    | 0    | 0 | 0     | 16    |
| 11aa | 8      | 2  | 0     | 0 | 0 | 0   | 0    | 0    | 1 | 0     | 11    |
| 12aa | 6      | 1  | 0     | 0 | 1 | 0   | 0    | 0    | 1 | 0     | 9     |
| 13aa | 1      | 0  | 0     | 0 | 0 | 0   | 0    | 1    | 0 | 0     | 2     |
| 14aa | 6      | 0  | 0     | 0 | 0 | 0   | 0    | 0    | 0 | 0     | 6     |
| 15aa | 6      | 2  | 0     | 0 | 0 | 0   | 0    | 0    | 0 | 0     | 8     |
| 16aa | 2      | 1  | 0     | 0 | 0 | 0   | 0    | 0    | 0 | 0     | 3     |
| 17aa | 1      | 0  | 1     | 0 | 0 | 0   | 0    | 0    | 0 | 0     | 2     |
| 18aa | 1      | 0  | 1     | 0 | 0 | 0   | 0    | 0    | 0 | 0     | 2     |
| 19aa | 0      | 0  | 0     | 0 | 0 | 0   | 0    | 0    | 0 | 0     | 0     |
| 20aa | 1      | 0  | 0     | 0 | 0 | 0   | 0    | 0    | 0 | 0     | 1     |
| 21aa | 1      | 0  | 0     | 0 | 0 | 0   | 0    | 0    | 0 | 0     | 1     |
| 22aa | 0      | 0  | 0     | 0 | 0 | 0   | 0    | 0    | 0 | 0     | 0     |
| 23aa | 0      | 0  | 0     | 0 | 0 | 0   | 0    | 0    | 0 | 0     | 0     |
| 24aa | 0      | 0  | 0     | 0 | 0 | 0   | 0    | 0    | 0 | 0     | 0     |
| 25aa | 0      | 0  | 0     | 0 | 0 | 0   | 0    | 0    | 0 | 0     | 0     |
| 26aa | 0      | 0  | 0     | 0 | 0 | 0   | 0    | 0    | 0 | 0     | 0     |
| 27aa | 1      | 0  | 0     | 0 | 0 | 0   | 0    | 0    | 0 | 0     | 1     |
| ≥6aa | 150    | 22 | 6     | 2 | 3 | 2   | 2    | 2    | 9 | 2     | 200   |

5aa SCSs here are solitary SCSs, which do not form any nonself cluster with other adjacent nonself SCSs.

**Supplementary Table S3. Self-nonsel status changes of SCSs due to point mutations in 68 variant proteomes of SARS-CoV-2.**

| Variant proteome | Serial SCS site number | Protein          | Status change site | Self/nonsel change |
|------------------|------------------------|------------------|--------------------|--------------------|
| ASM993794v1      | 3606 (1-3606)          | ORF1ab           | L3606F             | 0 to 1             |
| ASM1153713       | 2705 (1-2705)          | ORF1ab           | K2705K             | 1 to 0             |
| ASM1153723       | 901 (1-901)            | ORF1ab           | S901S              | 0 to 1             |
| ASM1153723       | 902 (1-902)            | ORF1ab           | M902I              | 1 to 0             |
| ASM1153723       | 8485 (3-124)           | ORF3a            | I124I              | 1 to 0             |
| ASM1153723       | 8489 (3-128)           | ORF3a            | W128L              | 1 to 0             |
| ASM1153723       | 8608 (3-247)           | ORF3a            | H247H              | 1 to 0             |
| ASM1153736       | 3073 (1-3073)          | ORF1ab           | E3073E             | 1 to 0             |
| ASM1153745       | 7888 (2-796)           | Spike (S)        | D796D              | 0 to 1             |
| ASM1153762       | 3606 (1-3606)          | ORF1ab           | L3606F             | 0 to 1             |
| ASM1153771       | 1836 (1-1836)          | ORF1ab           | Y1836Y             | 0 to 1             |
| ASM1153810       | 1856 (1-1856)          | ORF1ab           | S1856S             | 0 to 1             |
| ASM1153810       | 1858 (1-1858)          | ORF1ab           | E1858E             | 0 to 1             |
| ASM1153810       | 1859 (1-1859)          | ORF1ab           | Y1859Y             | 0 to 1             |
| ASM1154548       | 5826 (1-5826)          | ORF1ab           | R5826R             | 0 to 1             |
| ASM1154548       | 5827 (1-5827)          | ORF1ab           | N5827N             | 1 to 0             |
| ASM1154548       | 5863 (1-5863)          | ORF1ab           | S5863S             | 0 to 1             |
| ASM1174201       | 9552 (9-340)           | Nucleocapsid (N) | D340D              | 0 to 1             |
| ASM1174202       | 1607 (1-1607)          | ORF1ab           | I1607V             | 1 to 0             |

Redundant sites in plural variant proteomes are not included.

Status change site shows the first aa of SCS. For example, K2705K indicates that KSHNI changed to KSHSI.

Self andonsel SCSs are indicated by 0 and 1, respectively.

**Supplementary Table S4. Self-nonsel status changes of SCSs due to point mutations in the spike protein.**

| Status change site | Mutation site | Original SCS<br>(RefSeq) | Variant SCS | Self/nonsel<br>change |
|--------------------|---------------|--------------------------|-------------|-----------------------|
| <b>C15C</b>        | L18F          | CVNLT                    | CVNFT       | 0 to 1                |
| <b>R78R</b>        | D80A          | RFDNP                    | RFANP       | 0 to 1                |
| <b>A163A</b>       | N165Q         | ANNCT                    | ANQCT       | 0 to 1                |
| <b>N164N</b>       | N165Q         | NNCTF                    | NQCTF       | 0 to 1                |
| <b>P230P</b>       | N234Q         | PIGIN                    | PIGIQ       | 1 to 0                |
| <b>F338F</b>       | V341I         | FGEVF                    | FGEIF       | 0 to 1                |
| <b>C361C</b>       | D364Y         | CVADY                    | CVAYY       | 1 to 0                |
| <b>V367F</b>       | V367F         | VLYNS                    | FLYNS       | 0 to 1                |
| <b>G431G</b>       | I434K         | GCVIA                    | GCVKA       | 0 to 1                |
| <b>C432C</b>       | A435S         | CVIAW                    | CVISW       | 0 to 1                |
| <b>C432C</b>       | I434K         | CVIAW                    | CVKAW       | 0 to 1                |
| <b>V433V</b>       | A435S         | VIAWN                    | VISWN       | 1 to 0                |
| <b>V433V</b>       | I434K         | VIAWN                    | VKAWN       | 1 to 0                |
| <b>I434I</b>       | S438F         | IAWNS                    | IAWNF       | 0 to 1                |
| <b>A435S</b>       | A435S         | AWNSN                    | SWNSN       | 1 to 0                |
| <b>A435A</b>       | N439K         | AWNSN                    | AWNSK       | 1 to 0                |
| <b>Y449Y</b>       | L452R         | YNYLY                    | YNYRY       | 0 to 1                |
| <b>C484C</b>       | V483A         | CNGVE                    | CNGAG       | 0 to 1                |
| <b>E484K</b>       | E484K         | EGFNC                    | KGFNC       | 0 to 1                |
| <b>F486F</b>       | F490L         | FNCYF                    | FNCYL       | 1 to 0                |
| <b>N487N</b>       | F490L         | NCYFP                    | NCYLP       | 0 to 1                |
| <b>Q498Q</b>       | N501Y         | QPTNG                    | QPTYG       | 0 to 1                |
| <b>N501Y</b>       | N501Y         | NGVGY                    | YGVGY       | 0 to 1                |
| <b>C671C</b>       | Q675H         | CASYQ                    | CASYH       | 0 to 1                |
| <b>Y674Y</b>       | Q675H         | YQTQT                    | YHTQT       | 1 to 0                |
| <b>Q675H</b>       | Q675H         | QTQTN                    | HTQTN       | 1 to 0                |
| <b>Q677Q</b>       | P681H         | QTNSP                    | QTNSH       | 0 to 1                |
| <b>T678T</b>       | P681H         | TNSPR                    | TNSHR       | 0 to 1                |
| <b>A706A</b>       | N709Q         | AYSNN                    | AYSQN       | 0 to 1                |
| <b>I714I</b>       | N717Q         | IPTNF                    | IPTQF       | 0 to 1                |
| <b>A831V</b>       | A831V         | AGFIK                    | VGFIK       | 0 to 1                |
| <b>K1073K</b>      | N1074Q        | KNFTT                    | KQFTT       | 1 to 0                |
| <b>I1115I</b>      | D1118H        | ITTDN                    | ITTHN       | 0 to 1                |
| <b>T1116T</b>      | D1118H        | TTDNT                    | TTHNT       | 0 to 1                |
| <b>T1117T</b>      | D1118H        | TDNTF                    | THNTF       | 0 to 1                |
| <b>D1118H</b>      | D1118H        | DNTFV                    | HNTFV       | 0 to 1                |

Self and nonself SCSs are indicated by 0 and 1, respectively.
